# Supplementary material for: Public Perceptions of Mineral Criticality and Preferences for Energy Transition Strategies in the US
Source: Research Square preprint supplement (doi:10.21203/rs.3.rs-4462327/v1), 2024-06-17
Supplement: Supplementary file 1 [file 8206f095367b4387fb64c43e.docx]

**Appendix**

**A1: Descriptive statistics of variables measured in 5-point Likert scale**

**The median time taken to complete the survey was 5.36 minutes and a total of 1,193 respondents finished or completed the survey.**

Table A1: Descriptive statistics

| **Criticality Perception** | | | | | |
| --- | --- | --- | --- | --- | --- |
|  | Obs. | Mean | Std. dev. | Min. | Max. |
| National security | 1,192 | 3.97 | 0.94 | 1 | 5 |
| Clean energy | 1,192 | 4.08 | 0.94 | 1 | 5 |
| High-tech industry | 1,192 | 4.10 | 0.86 | 1 | 5 |
| Global concentration | 1,192 | 4.03 | 0.87 | 1 | 5 |
| Import dependency | 1,192 | 3.85 | 0.93 | 1 | 5 |
| Need more | 1,192 | 4.03 | 0.90 | 1 | 5 |
| Geopolitics | 1,192 | 3.95 | 0.86 | 1 | 5 |
| Environmental harm | 1,192 | 3.60 | 1.13 | 1 | 5 |
|  | | | | | |
| **Mineral-Energy Nexus Awareness** | | | | | |
|  | Obs. | Mean | Std. dev. | Min. | Max. |
| Minerals important for clean energy technology | 1,193 | 4.06 | 0.75 | 1 | 5 |
| Mineral availability affects energy transition | 1,193 | 4.10 | 0.77 | 1 | 5 |
|  | | | | | |
| **Mineral Strategy for Successful Energy Transition** | | | | | |
|  | Obs. | Mean | Std. dev. | Min. | Max. |
| Domestic mining | 1,193 | 3.44 | 0.97 | 1 | 5 |
| Recycling | 1,193 | 4.16 | 0.82 | 1 | 5 |
| Research | 1,193 | 4.32 | 0.71 | 1 | 5 |
| Improve environmental impact | 1,193 | 4.23 | 0.85 | 1 | 5 |
| Educate public | 1,193 | 4.11 | 0.86 | 1 | 5 |
| International cooperation | 1,193 | 4.14 | 0.81 | 1 | 5 |
|  | | | | | |
| **Other Questions** | | | | | |
|  | Obs. | Mean | Std. dev. | Min. | Max. |
| Familiarity with critical minerals | 1,193 | 1.84 | 0.75 | 1 | 3 |
| PN: Renewable future | 1,193 | 3.52 | 1.03 | 1 | 5 |
| PN: Respect earth, protect environment | 1,193 | 4.09 | 0.88 | 1 | 5 |
| Climate change a social problem | 1,193 | 4.17 | 1.13 | 1 | 5 |
| Support for energy transition | 1,193 | 4.15 | 1.00 | 1 | 5 |
| Seek information/products on clean energy | 1,193 | 2.79 | 1.13 | 1 | 5 |

PN stands for personal norm.

**A2: Characteristics of survey respondents**

Close to 93% of the respondents said that they do not own or lease any electric vehicle, while 7.2% said they own/lease an electric vehicle and the rest less than 1% indicated their response as “I don’t know/I am not sure” (Figure A1).

Figure A1: Do you own or lease an electric vehicle?

Close to 63% of the respondents said that they do not live close to a mining site, while 7% said they live close to a mine site (within a 25-mile radius) and the rest 31% indicated their response as “I don’t know/I am not sure” (Figure A2).

Figure A2: Do you live within a 25-mile radius of a mining site?

The survey data shows that individuals aged 18-24 made up close to 12% of respondents, while those aged 25-34 comprised close to 18%. People aged 35-44 accounted for 17% of participants, followed by about 16% in the 45-54 age group (Figure A3). Additionally, about 25% of respondents were aged 55-64, while those aged 65 and above represented 12% of the surveyed population. Some respondents chose not to disclose their age, selecting "Prefer not to say."

Figure A3: How old are you?

Figure A4 shows that about 13% of people earn less than $25,000 a year, while 23% earn between $25,000 and $49,999. Around 19% earn between $50,000 and $74,999, and about 17% earn between $75,000 and $99,999. Moreover, roughly 11% earn between $100,000 and $149,999, and close to 2% earn $150,000 or more annually. Some respondents, about 17%, choose not to reveal their income, selecting "Prefer not to say."

Figure A4: What was your total household income before taxes during the past 12 months?

In the survey, 48% of respondents identified as male, while 51% identified as female (Figure A5). Additionally, 2% identified as non-binary/third gender, and less than 1% chose not to disclose their gender, selecting "Prefer not to say”.

Figure A5: Gender - How do you identify?

Figure A6 shows that less than 1% of respondents reported having attained some high school education or less, while 10% held a high school diploma or GED. Additionally, about 20% had completed some college but did not obtain a degree, and 13% had earned an associate's or technical degree. Furthermore, close to 39% of respondents had obtained a bachelor's degree, and 18% held a graduate or professional degree (such as MA, MS, MBA, PhD, JD, MD, DDS, etc.). Lastly, very few people, less than 1% of respondents, chose not to disclose their educational attainment, selecting "Prefer not to say."

Figure A6: What is the highest level of education you have completed?

Figure A7 presents a correlation analysis. We find that individuals who agree with the role of minerals in the manufacturing of clean energy technologies (Mineral Energy Nexus 1) also highly agree with the statement that mineral availability affects the energy transition (Mineral Energy Nexus 2). This is presented in the yellow cells with a high positive correlation. Individuals who have climate change awareness are also the ones who support the energy transition, and this is indicated by the orange/golden cells. The figure also shows that individuals who believe climate change is a social problem and those who support the energy transition do not support domestic mining (negative correlation) as an energy transition mineral strategy. Individuals whose criticality perception is shaped by environmental harm effects are less likely to support domestic mining as a mineral strategy that will help the nation successfully achieve energy transition goals.

Figure A7: Correlation analysis

**A3:** **The role of public participation in and policymaking**

Studies show that the public could trigger a change in the design and implementation of climate change policies (Bostrom et al., 2012; Broecks et al., 2021). For example, US state/city policies banning or taxing single-use plastic bags are to some extent due to public pressure and advocacy; the Dutch’s ruling against onshore carbon storage was due to public opposition (Broecks et al., 2021); and smoke-free policies were designed based on scientific evidence as well as public opinions (Thomson et al., 2009). According to Hisschemöller and Midden (1999), there are four arguments as to why policymakers pay attention to public perception regarding climate-related policies: (1) to identify and address deficits in scientific knowledge, (2) to understand social and cultural factors that interact with technology adoption (e.g., information diffusion), (3) to gauge public opinion on potential policy issues and gain insights into concerns, and (4) to design communication and awareness programs

The public, even when they fully support climate mitigation efforts, can sometimes oppose mining projects because of several factors (e.g., socio-environmental impacts, lack of knowledge, etc.). This might make some policies ineffective in achieving goals if they are not properly designed or adjusted with broader social perspectives or in consultation with local communities. For example, if communities oppose domestic mining that supplies electric vehicle (EV) battery manufacturers, then it is unclear whether national policies (such as the clean vehicle provision of the Inflation Reduction Act) would be successful. Thus, it is important to evaluate what type of policies align private to social incentives; and exactly measure the extent of tradeoffs embodied in current approaches.

Theoretically, there are two schools of thought, technical and participatory approaches, on the need to involve the public in climate-related policymaking (see Figure A8). These approaches represent different conceptual views of the public in terms of their relationship to policy decision-making. The *technical school* argues for a science-driven policy where the public is viewed as a passive consumer of policy decisions (lay people). In this school, policy decisions are solely made by experts and scientists because the public is assumed to be unable/unwilling to contribute to policymaking. For example, people are assumed to be driven by emotions and self-interest rather than social interest. In this school, any public resistance to new approaches is viewed as being a result of mistrust or lack of knowledge. Studies show this approach may be counter-productive (Hisschemöller and Midden, 1999). The *participation approach* is the opposite where scientific experts are not necessarily recognized as having additional privileges over the public. Every person (expert or non-expert) is viewed as having a role and so citizen participation is assumed to yield better decisions. This approach considers all individuals with standing (affected by the policy or the initial problem the policy is designed to solve). Public participation is sought not just to gain legitimacy or generate consensus, but to comprehensively understand complex issues with multiple or novel perspectives from within the society.

Policymaking in the US is not limited to the scientific community and allows for participation from multiple groups and stakeholders at different degrees (e.g., scientists, public, community groups, etc.) although it is acknowledged that most citizens may lack full knowledge. In addition, the role of the public as a political actor is becoming an increasingly important factor that affects policy decisions. That is why there is a need to understand public perceptions of critical minerals policy. Since policymaking must balance benefits with perceived or real risks (Benjamin, 2023), there is a need to understand some of these risks.

Figure A8: Extent of public participation in policymaking.
